# Supplementary material for: Incomplete proline catabolism drives premature sperm aging
Source: PubMed Central journal article supplement (PMC7884046; doi:10.1111/acel.13308), 2021-01-21

(a)

| Gene ID        | Codon change   | Protein sequence changed |
|----------------|----------------|--------------------------|
| F56D5.1        | gGt/gAt        | G149D                    |
| R11A8.1        | Ggt/Agt        | G242S                    |
| K08E4.1        | Ctt/Ttt        | L1174F                   |
| C39E9.9        | Gaa/Aaa        | E246K                    |
| Y105C5A.24     | Ctt/Ttt        | L388F                    |
| C06A12.3       | aCa/aTa        | T22I                     |
| <b>B0513.5</b> | <b>Gtg/Atg</b> | <b>V124M</b>             |

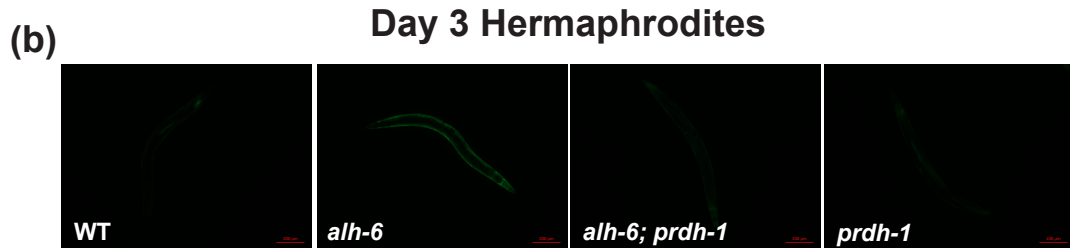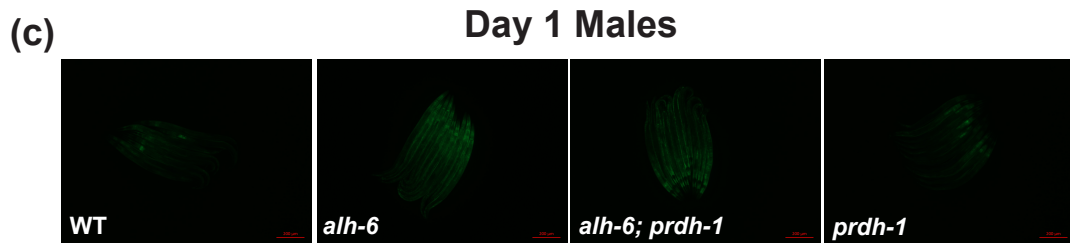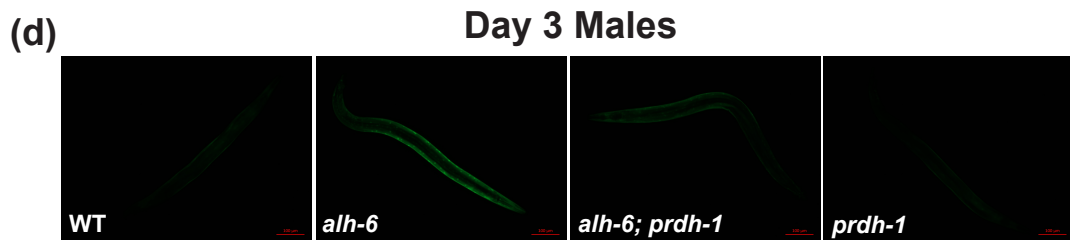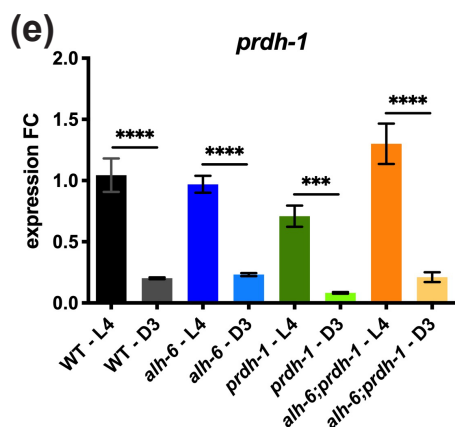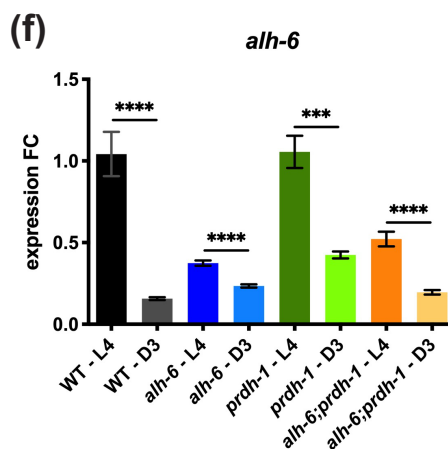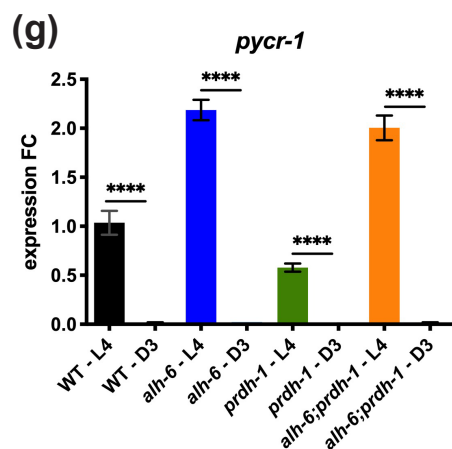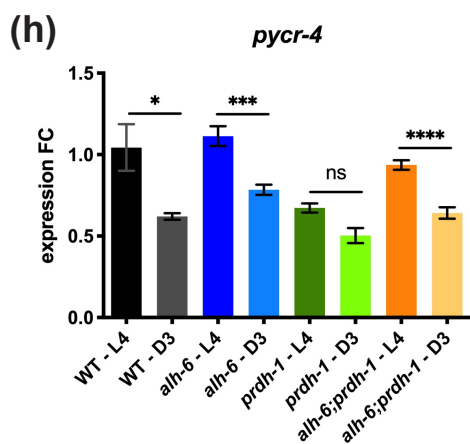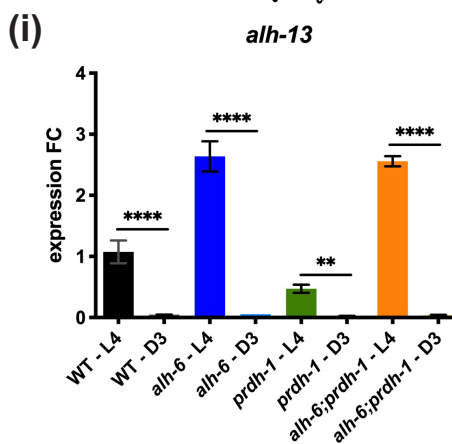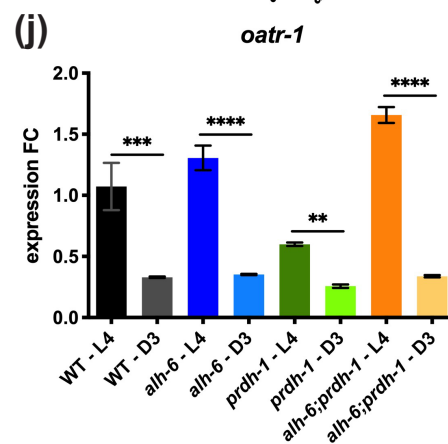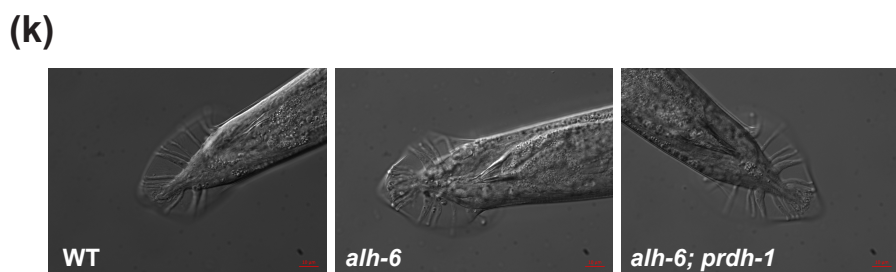

Supplement: ACEL-20-e13308-s001.pdf [file ACEL-20-e13308-s001.pdf]
