# Supplementary material for: Incomplete proline catabolism drives premature sperm aging
Source: PubMed Central journal article supplement (PMC7884046; doi:10.1111/acel.13308), 2021-01-21

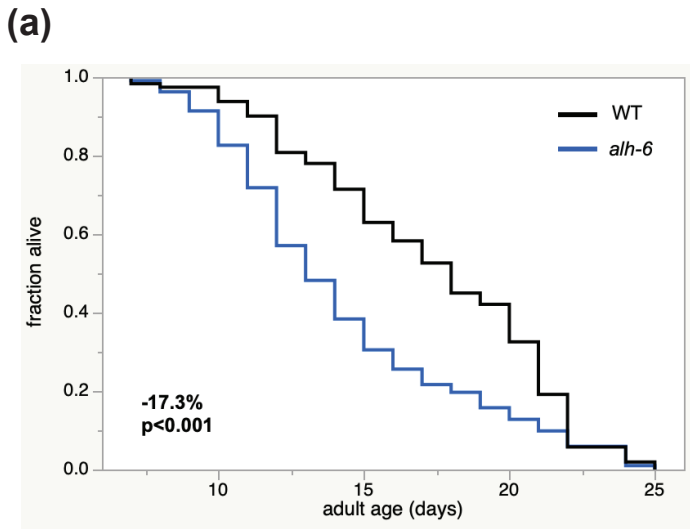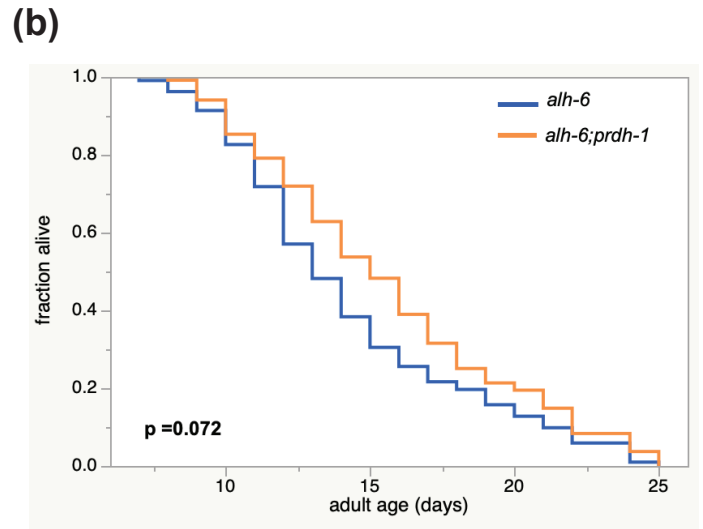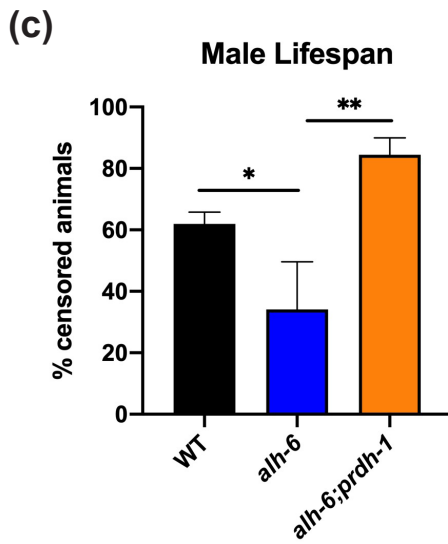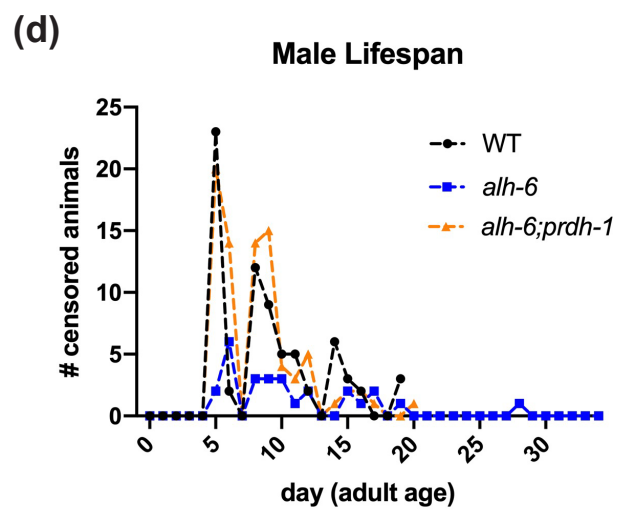

Supplement: ACEL-20-e13308-s004.pdf [file ACEL-20-e13308-s004.pdf]
